# Supplementary material for: Ecological Effect of Arginine on Oral Microbiota
Source: PubMed Central journal article supplement (PMC5543048; doi:10.1038/s41598-017-07042-w), 2017-08-03
Supplement: 41598_2017_7042_MOESM1_ESM.pdf [file 41598_2017_7042_MOESM1_ESM.pdf]

## Ecological Effect of Arginine on Oral Microbiota

Xin Zheng<sup>1,2#</sup>, Jinzhi He<sup>1,2#</sup>, Lin Wang<sup>3</sup>, Shuangshuang Zhou<sup>1,2</sup>, Xian Peng<sup>1</sup>, Shi Huang<sup>4</sup>,  
Liwei Zheng<sup>1,5</sup>, Lei Cheng<sup>1,2</sup>, Yuqing Hao<sup>1,6</sup>, Jiyao Li<sup>1,2</sup>, Jian Xu<sup>4</sup>, Xin Xu<sup>1, 2\*</sup>, Xuedong  
Zhou<sup>1,2\*</sup>

1. State Key Laboratory of Oral Diseases, West China Hospital of Stomatology, Sichuan University, Chengdu, China

2. Department of Operative Dentistry and Endodontics, West China Hospital of Stomatology, Sichuan University, Chengdu, China

3. Department of Operative Dentistry and Endodontics, Hospital of Stomatology, Wenzhou Medical University, Wenzhou, China.

4. Single-Cell Center, Qingdao Institute of Bioenergy and Bioprocess Technology, Chinese Academy of Sciences, Qingdao, Shandong, China

5. Department of Pediatric Dentistry, West China Hospital of Stomatology, Sichuan University, Chengdu, China

6. Department of Geriatric Dentistry, West China Hospital of Stomatology, Sichuan University, Chengdu, China

#These authors contributed equally to this work

\*Corresponding authors: Xuedong Zhou, D.D.S., Ph.D., State Key Laboratory of Oral Diseases, West China Hospital of Stomatology, Sichuan University. No. 14, Section 3, Renmin South Road, Chengdu, China 610041. (O) 86-28-85501481; (email): [zhouxd@scu.edu.cn](mailto:zhouxd@scu.edu.cn). Xin Xu, D.D.S., Ph.D., State Key Laboratory of Oral Diseases, West China Hospital of Stomatology, Sichuan University. No. 14, Section 3, Renmin South Road, Chengdu, China 610041. (O) 86-28-85503494; (email): [xin.xu@scu.edu.cn](mailto:xin.xu@scu.edu.cn).

26  
27  
28  
29  
30  
31  
32  
33  
34  
35  
36  
37  
38  
39  
40  
41  
42  
43  
44  
45  
46  
47  
48  
49  
50  
51  
52  
53  
54  
55  
56  
57  
58  
59  
60  
61  
62  
63  
64  
65

## Supporting Information

***In situ* plaque acquisition device.** Custom-made *in situ* plaque acquisition palatal devices were made with six sites recessed into the polished surface (Supplementary Fig. S2). Hydroxyapatite discs (4 mm x 4 mm x 2 mm), which had been stored in 0.1% thymol solution (pH = 7.0) at 4 °C, were randomly assigned to each site and fixed with silicone rubber. Every site kept a 1 mm uniform gap covered by a plastic mesh to allow for the free contact of saliva with specimen's surface, and to protect it from mechanical disturbance. To minimize the contact between the tongue and the specimens, the sites were positioned posterior to the incisive papillae. Prior to the beginning of each phase, subjects had an appliance try-in appointment when needed adjustments were made. The participants wore the appliances more than 20 h every day allowing the salivary pellicle to have full access to the appliances in mouth, but withdraw them only during the main meals (3 times/day) and brushing time, when the appliance should be stored in humid conditions.

**16S rRNA amplicon sequencing.** The barcoded 16S rRNA amplicon (V1-V2 region) sequencing was performed through Illumina MiSeq technology at Majorbio, Shanghai. Primers used in present study was 27F (5'- AGAGTTTGATCCTGGCTCAG-3) and 338R (5'- TGCTGCCTCCCGTAGGAGT-3')<sup>1</sup>. A unique 12- mer tag for each DNA sample was added to the 5'-end of both primers to pool multiple samples for one run. PCR product was visualized on 3% agarose gels. Then, amplicons of all samples were gel purified, quantified with Pico-Green kit, pooled in an equal molar, assessed using Agilent BioAnalyzer 2100 (Invitrogen, USA), and sequenced. Sequences were trimmed using Trimmomatic<sup>2</sup> based on quality scores 20, and pair-end reads were merged into longer reads by FLASH<sup>3</sup>. Unqualified sequences were removed if they were too short or contained ambiguous residues. OTUs were clustered using Usearch (version 7.1, <http://drive5.com/uparse/>) at the 97% similarity level, and final OTUs were generated based the clustering results. The sequencing raw data has been deposited in public database Sequence Read Archive (<http://www.ncbi.nlm.nih.gov/Traces/sra>) with accession no. SRP082293.

**Bacterial quantification by qPCR.** qPCR amplification was performed on the CFX96 system (Bio-Rad, Hercules, CA). The reaction mixture (25 µl) contained Premix Ex Taq (TaKaRa, Japan), template DNA (100 ng), forward and reverse primers (500 nM each), and probes (250 nM). Thermal cycling conditions were designated as follows: initial denaturation at 95 °C for 30 s, followed by 40 cycles of 95 °C for 5 s and 56 °C for 30 s. Threshold cycle (CT) values were determined, and the CFU/ml was calculated based on the standard curve (Log CFU/ml versus CT) generated using standard strains respectively. *S. mutans*, *S. sanguinis*, *S. gordonii*, *A. naeslundii*, *P. gingivalis* and all bacteria were quantified (primers and probes were listed in Table. S4).

66 **Fluorescence *in situ* hybridization.** Fluorescence *in situ* hybridization was performed as  
67 described previously<sup>4,5</sup>. Fixed biofilms specimens established on hydroxyapatite discs were  
68 rinsed with distilled water and dried for 10 min at 46 °C. To enable probe penetration, the  
69 specimens were treated with 1 ml of lysis buffer [100 mM Tris-HCl (Sigma), 50 mM EDTA  
70 (Sigma), 30 mg/ml lysozyme (Sigma), pH = 8.0] for 20 min at 37 °C. The specimens were  
71 then rinsed with distilled water, serially dehydrated in ethanol (50%, 80% and 100%; 3 min  
72 each) and dried for 10 min at 46 °C. The specimens were then exposed to 20 µl of  
73 hybridization buffer (0.9 M NaCl, 20 mM Tris-HCl, 0.01% SDS, 20% formamide)  
74 containing the designated oligonucleotide probes (200 nM each) and incubated at 46 °C for  
75 90 min in a closed cassette with a piece of paper-towel and 5 ml of hybridization buffer to  
76 equilibrate humidity. After hybridization, the glass slides were first washed in buffer (20  
77 mM Tris-HCl, 5 mM EDTA, 0.01% SDS, 215 mM NaCl) for 15 min in a water bath at  
78 48 °C, and then rinsed in ice-cold nuclease-free water. Custom synthesized oligonucleotide  
79 probes, labeled at the 5'-end with Alexa Fluor 488 or Alexa Fluor 594 were purchased from  
80 Invitrogen. Probe sequences are listed in Table. S4.

81 Biofilm images were examined using an Olympus BX3-CBH fluorescence microscope  
82 (Olympus Corp.) equipped with a 60× (1.42 numerical aperture) oil immersion objective  
83 lens, set SpGr-B Filter (Semrock, Inc.) for Alexa Fluor 488 and SpRed-B Filter (Semrock,  
84 Inc.) for Alexa Fluor 594. Black-and-white micrographs from at least 3 randomly selected  
85 positions of each sample were taken with an Andor iXon3 camera (Andor), the ISO (= 400)  
86 and exposure time (= 0.1s) were kept constant. Images were processed using Cell Sens  
87 Dimension (Olympus Corp.) without any qualitative changes to the raw images. The  
88 amount of bacteria was analyzed with Image pro plus 6.0 (Media Cybernetics, Silver  
89 Spring, MD) based on integral optical density (IOD). The data are reported as the mean of  
90 3 separate tests, and representative pictures are shown.

91 **Human enamel discs preparation.** Twenty human permanent molars free of white spots,  
92 cracks and other defects were collected from the West China Hospital of Stomatology. The  
93 teeth were stored at 4 °C in water containing 0.05% thymol prior to sample preparation.  
94 Crowns were separated from roots and then cut into four sections (approximately 4 mm x  
95 4 mm x 3 mm) with a diamond-coated saw (Struers Minitom; Struers, Denmark) under  
96 constant water cooling, resulting in an overall sample size of 80 enamel slabs. The enamel  
97 slabs were embedded in polymethylmethacrylate, and natural tooth surfaces were then  
98 polished progressively with water proof SiC abrasive papers (800-2400 grit; Struers),  
99 followed by polishing on a felt cloth impregnated with 1-5 µm diamond paste. This resulted  
100 in the removal of approximately 200 µm of the outer enamel layer. The specimens were  
101 ultrasonically cleaned in a deionized water bath for 2 min and then visually inspected to  
102 ensure removal of surface debris. All enamel discs were coated with one layer of acid-  
103 resistant nail varnish except for a rectangular window (3 x 2 mm) in the middle, and then  
104 disinfected with ultraviolet radiation. Portions of saliva samples collected from 5 CA  
105

106 donors in the first recruitment (see information in Supplementary Table S1) were pooled  
107 together, diluted in PBS (1:5), and then filtered through 0.22  $\mu\text{m}$  syringer syringe filter. The  
108 enamel discs were coated by immersing in aseptic human saliva under 37  $^{\circ}\text{C}$  for 2 h.

109  
110 **TMR analysis.** After demineralization assay, specimens were longitudinally sectioned  
111 through the center using a hard tissue sectioning saw (Struers Minitom, Copenhagen,  
112 Denmark), and then polished progressively to thin plano-parallel sections ( $\sim 100$   $\mu\text{m}$  thick)  
113 with water proof SiC abrasive papers (400-3000 grit). The sections were placed on a special  
114 designed Inspector sample-holder (Inspektor Research Systems BV, Netherlands) that was  
115 then fitted to a camera connected to an X-ray generator (Softex, Japan), and exposed to  
116  $\text{CuK}\alpha$  radiation. Developed X-ray films were examined using Zeiss AXIO Imager A2  
117 microscope (Carl Zeiss, Germany) equipped with a digital camera. Acquired images were  
118 analyzed using TMR2006 (Inspektor Research Systems BV). In details, a “zero patch” and  
119 “sound patch” within the image will be identified automatically when import the image  
120 into the software. Then, a curve between mineral volume percentage (vol%) and sample  
121 position ( $\mu\text{m}$ ) will be generated. Through this curve, lesion depth ( $\mu\text{m}$ ) and integrated  
122 mineral loss (vol%  $\times$   $\mu\text{m}$ ) will be calculated.

123

124  
125  
126  
127  
128  
129  
130  
131  
132  
133  
134  
135  
136  
137

## References

- 1 Ravel, J. *et al.* Vaginal microbiome of reproductive-age women. *Proc. Natl. Acad. Sci. U. S. A.* **108**, 4680-4687 (2011).
- 2 Bolger, A. M., Lohse, M. & Usadel, B. Trimmomatic: a flexible trimmer for Illumina sequence data. *Bioinformatics*, btu170 (2014).
- 3 Magoč, T. & Salzberg, S. L. FLASH: fast length adjustment of short reads to improve genome assemblies. *Bioinformatics* **27**, 2957-2963 (2011).
- 4 Zheng, X. *et al.* Involvement of gshAB in the interspecies competition within oral biofilm. *J. Dent. Res.* **92**, 819-824 (2013).
- 5 Klug, B. *et al.* Oral biofilm analysis of palatal expanders by fluorescence in-situ hybridization and confocal laser scanning microscopy. *J Vis Exp*, e2967-e2967 (2011).

**Supplementary Fig. S1**

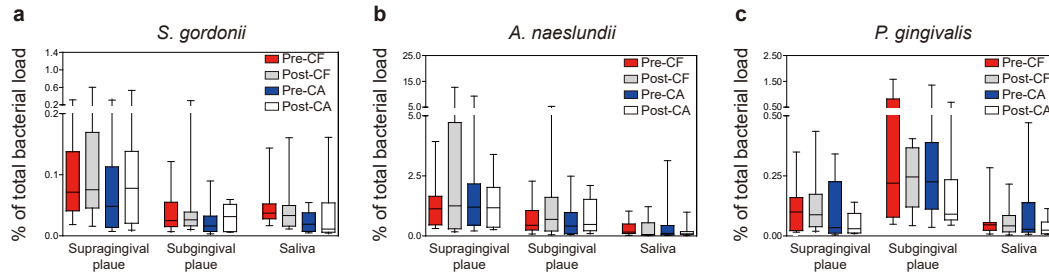

**Supplementary Figure S1.** Abundance of *S. gordonii* (a), *A. naeslundii* (b) and *P. gingivalis* (c) before and after 2-week arginine-containing dentifrice treatment. Bacterial counts were determined by qPCR, and normalized with the total bacterial load. Data are present as standard box plot, with the boxes presenting the first and third quartiles and the whiskers representing the 5<sup>th</sup> and 95<sup>th</sup> percentiles. (n = 15; Kruskal-Wallis test). Pre-CF and Post-CF = caries-free group before and after arginine-containing toothpaste treatment respectively; Pre-CA and Post-CA = caries-active group before and after arginine-containing toothpaste treatment respectively.

Supplementary Fig. S2

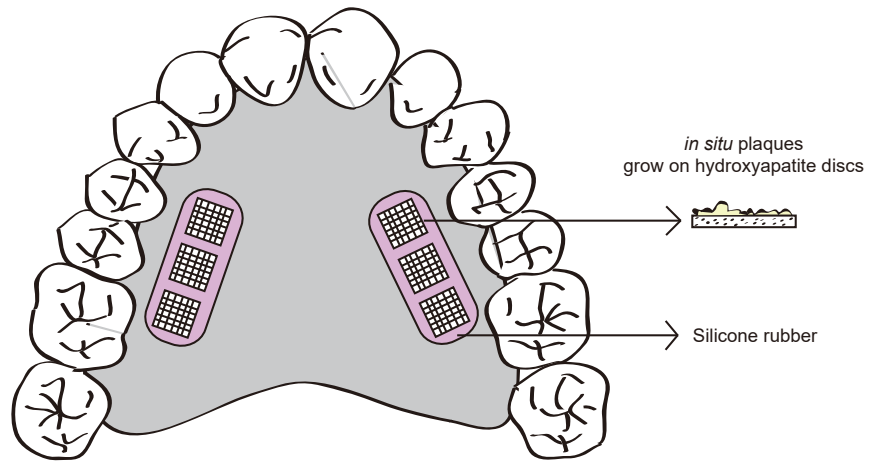

Supplementary Figure S2. Schematic diagram of customized *in situ* plaque acquisition device.

**Supplementary Fig. S3**

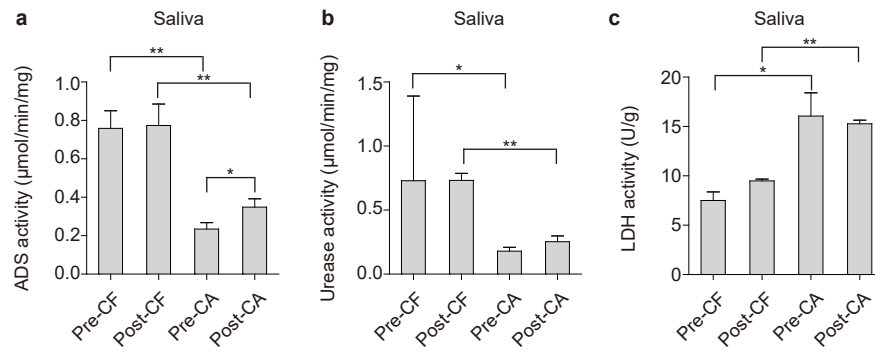

**Supplementary Figure S3.** Arginine deiminase system (ADS) (a), urease (b) and lactate dehydrogenase (LDH) (c) activities in saliva samples before and after 2-week arginine-containing dentifrice treatment. Data are present as mean  $\pm$  standard deviation (s.d.). (n = 15; one-way ANOVA test followed by Tukey's test; \* p < 0.05, \*\* p < 0.01). Pre-CF and Post-CF = caries-free group before and after arginine-containing toothpaste treatment respectively; Pre-CA and Post-CA = caries-active group before and after arginine-containing toothpaste treatment respectively.



Supplementary Fig. S4

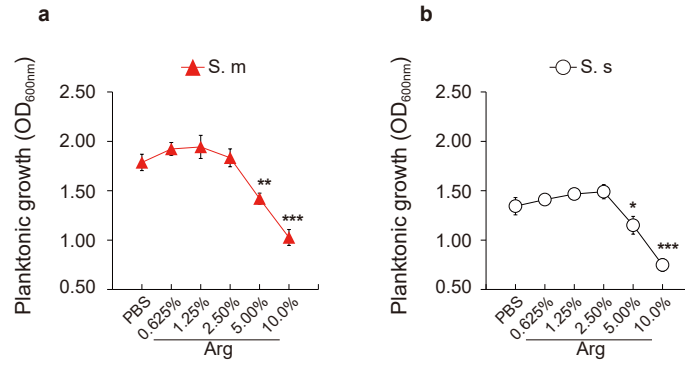

**Supplementary Figure S4.** 24-hour growth of *S. mutans* (S. m) (a) and *S. sanguinis* (S. s) (b) in planktonic cultures contained different concentrations of arginine (Arg). Data are present as mean  $\pm$  s.d. (n = 3; one-way ANOVA test followed by Dunnett's test to compare experimental groups with PBS-treated control group; \* p < 0.05, \*\* p < 0.01, \*\*\* p < 0.001). OD<sub>600nm</sub> = optical density at 600nm.

**Supplementary Table S1. Epidemiologic profile of the study group**

CF: caries-free; CA: caries-active; DMFT: decayed, missing and filled teeth.

The saliva samples, from the 5 underscored individuals in CA group, were also used as inoculum in saliva-derived biofilm and for enamel discs coating.

The 3 asterisked individuals from each group in the 2nd recruitment were asked to wear the *in situ* plaque acquisition devices.

|                    |         | Age | Gender | DMFT |              | Age | Gender | DMFT |
|--------------------|---------|-----|--------|------|--------------|-----|--------|------|
|                    | CF-1    | 21  | M      | 0    | CA-1         | 25  | M      | 7    |
|                    | CF-2    | 23  | F      | 0    | CA-2         | 27  | F      | 7    |
|                    | CF-3    | 24  | F      | 0    | <u>CA-3</u>  | 19  | F      | 6    |
|                    | CF-4    | 22  | F      | 0    | CA-4         | 23  | F      | 9    |
|                    | CF-5    | 21  | M      | 0    | <u>CA-5</u>  | 22  | F      | 8    |
|                    | CF-6    | 29  | M      | 0    | <u>CA-6</u>  | 28  | F      | 7    |
|                    | CF-7    | 20  | F      | 0    | CA-7         | 24  | M      | 6    |
| 1st<br>recruitment | CF-8    | 24  | M      | 0    | CA-8         | 20  | F      | 6    |
|                    | CF-9    | 24  | F      | 0    | CA-9         | 21  | F      | 6    |
|                    | CF-10   | 23  | F      | 0    | CA-10        | 19  | M      | 6    |
|                    | CF-11   | 23  | F      | 0    | <u>CA-11</u> | 25  | F      | 7    |
|                    | CF-12   | 27  | F      | 0    | CA-12        | 25  | F      | 6    |
|                    | CF-13   | 19  | F      | 0    | CA-13        | 25  | F      | 6    |
|                    | CF-14   | 21  | F      | 0    | <u>CA-14</u> | 19  | F      | 7    |
|                    | CF-15   | 27  | M      | 0    | CA-15        | 27  | F      | 6    |
|                    | CF-16 * | 21  | M      | 0    | CA-16        | 19  | F      | 7    |
|                    | CF-17 * | 25  | M      | 0    | CA-17 *      | 20  | F      | 8    |
| 2nd<br>recruitment | CF-18   | 26  | F      | 0    | CA-18        | 19  | F      | 6    |
|                    | CF-19   | 19  | M      | 0    | CA-19 *      | 22  | F      | 7    |
|                    | CF-20 * | 31  | M      | 0    | CA-20        | 24  | M      | 8    |
|                    | CF-21   | 23  | M      | 0    | CA-21 *      | 23  | F      | 7    |

**Supplementary Table S2. Statistical analysis of saliva microbiota data**

|                        | ANOSIM      |         | Adonis      |         |
|------------------------|-------------|---------|-------------|---------|
|                        | R statistic | P value | R statistic | P value |
| Pre-CF v.s<br>Pre-CA   | 0.094       | 0.027   | 0.05945     | 0.035   |
| Post-CF v.s<br>Post-CA | 0.061       | 0.060   | 0.04623     | 0.065   |

Supplementary Table S3. Taxa with significantly different abundances between pre- and post- arginine exposure.

|                           | OTU ID                  | Level   | Phylogenic information                                | Post-treatment RA* (mean)                   | Pre-treatment RA (mean) | p value (Student's t-test) |                     |
|---------------------------|-------------------------|---------|-------------------------------------------------------|---------------------------------------------|-------------------------|----------------------------|---------------------|
| <b>Caries active (16)</b> | OTU238                  | genus   | <i>Streptococcus</i>                                  | 0.014428571427619                           | 0.0272539682538095      | 0.0287322143279573         |                     |
|                           | OTU631                  | genus   | <i>Streptococcus</i>                                  | 0.0179814814819048                          | 0.0254550264557143      | 0.0406493412458229         |                     |
|                           | OTU647                  | genus   | <i>Streptococcus</i>                                  | 0.00273809523857143                         | 0.00436243386190476     | 0.00821312267871388        |                     |
|                           | OTU436                  | species | <i>Actinomyces_odontolyticus</i>                      | 0.00192063492047619                         | 0.00357671957714286     | 0.0190252673219292         |                     |
|                           | OTU635                  | species | <i>uncultured_Oribacterium_sp.</i>                    | 0.000854497355714286                        | 0.001611111111111142857 | 0.0159943054817966         |                     |
|                           | OTU401                  | genus   | <i>Granulicatella</i>                                 | 0.0010952380952381                          | 0.00151851851857143     | 0.0629713714552705         |                     |
|                           | OTU59                   | species | <i>Capnocytophaga_leadbetteri</i>                     | 0.000714285714285714                        | 0.00142063492190476     | 0.103977546924764          |                     |
|                           | OTU278                  | species | <i>Prevotella_aurantiaca</i>                          | 0.00088888889047619                         | 0.000835978836666667    | 0.919644385554964          |                     |
|                           | OTU107                  | genus   | <i>Neisseria</i>                                      | 0.0011058201052381                          | 0.000637566137142857    | 0.0558813085065954         |                     |
|                           | OTU48                   | species | <i>uncultured_bacterium</i>                           | 0.000314814816190476                        | 0.000521164021428571    | 0.0805627814308618         |                     |
|                           | OTU576                  | species | <i>Capnocytophaga_sputigena</i>                       | 0.000195767197142857                        | 0.000481481480952381    | 0.00256717018032984        |                     |
|                           | OTU376                  | species | <i>uncultured_bacterium_oral_clone_BE109</i>          | 0.00100000000095238                         | 0.000201058201428571    | 0.0618817295262861         |                     |
|                           | OTU474                  | species | <i>Capnocytophaga_sp_oral_taxon_326_str_F0382</i>     | 6080000000.0000                             | 0.00012962963           | 0.0174168921911011         |                     |
|                           | OTU23                   | species | <i>Staphylococcus_epidermidis_RP62A_phage_SP_beta</i> | 0.0000                                      | 2650000000.0000         | 0.0212335441002185         |                     |
|                           | OTU143                  | phylum  | <i>Firmicutes</i>                                     | 5820000000.0000                             | 1590000000.0000         | 0.0997045248970978         |                     |
|                           | OTU422                  | species | <i>Eubacterium_brachy</i>                             | 2650000000.0000                             | 18.5000                 | 0.0300466474182891         |                     |
|                           | <b>Caries free (22)</b> | OTU142  | species                                               | <i>uncultured_bacterium_g_Lautropia</i>     | 0.00319312169285714     | 0.00773015872904762        | 0.0333456756095828  |
|                           |                         | OTU677  | species                                               | <i>uncultured_bacterium_g_norank</i>        | 0.00718253968190476     | 0.00351322751285714        | 0.0634486356966597  |
|                           |                         | OTU101  | species                                               | <i>uncultured_bacterium_g_Porphyromonas</i> | 0.00462433862428571     | 0.001944444444571429       | 0.0111908318032726  |
|                           |                         | OTU449  | species                                               | <i>uncultured_bacterium_g_Actinomyces</i>   | 0.00237566137571429     | 0.00106084656142857        | 0.00567353117475126 |
|                           |                         | OTU358  | species                                               | <i>uncultured_bacterium_g_Leptotrichia</i>  | 0.000500000000952381    | 0.000883597883809524       | 0.0241323035753485  |
|                           |                         | OTU228  | species                                               | <i>Prevotella_sp_oral_clone_ID019</i>       | 0.00236772486761905     | 0.000865079365238095       | 0.0944003504051492  |
| OTU344                    |                         | species | <i>Prevotella_shahii</i>                              | 0.000925925928666667                        | 0.00046031746047619     | 0.0500469896422407         |                     |
| OTU25                     |                         | genus   | <i>Actinomyces</i>                                    | 0.000722222223333333                        | 0.000269841271428571    | 0.146035310883622          |                     |
| OTU248                    |                         | species | <i>Leptotrichia_trevisanii</i>                        | 9259259333.3333                             | 0.000251322751904762    | 0.143983565624927          |                     |
| OTU242                    |                         | species | <i>uncultured_candidate_division_TM7_bacterium</i>    | 105820109.5238                              | 0.000187830688095238    | 0.123486361635921          |                     |
| OTU607                    |                         | species | <i>Kingella_dentificans</i>                           | 0.000534391534761905                        | 0.000185185185714286    | 0.0190008932084693         |                     |
| OTU619                    |                         | family  | <i>Enterobacteriaceae</i>                             | 5291005285.7143                             | 0.000164021164761905    | 0.0334255528805308         |                     |
| OTU398                    |                         | genus   | <i>Streptococcus</i>                                  | 3174603190.4762                             | 7407407428.5714         | 0.084158197632675          |                     |
| OTU315                    |                         | genus   | <i>uncultured</i>                                     | 1851851952.3810                             | 6613756714.2857         | 0.0203227408724832         |                     |
| OTU378                    |                         | species | <i>Clostridiales_bacterium_oral_taxon_093</i>         | 1587301619.0476                             | 5820105857.1429         | 0.072476959760371          |                     |
| OTU469                    |                         | species | <i>Neisseria_sp_oral_clone_API32</i>                  | 0.000462962962857143                        | 5555555571.4286         | 0.0257998650111579         |                     |
| OTU166                    |                         | species | <i>Leptotrichia_goodfellowii</i>                      | 79365080.9524                               | 4232804238.0952         | 0.0239341222456025         |                     |
| OTU431                    |                         | species | <i>uncultured_organism</i>                            | 79365080.9524                               | 2910052952.3810         | 0.0724769520712709         |                     |
| OTU359                    |                         | genus   | <i>Acinetobacter</i>                                  | 0.0000                                      | 2116402190.4762         | 0.0422855865049289         |                     |
| OTU231                    |                         | species | <i>uncultured_actinobacterium</i>                     | 0.0000                                      | 1058201142.8571         | 0.0422855890881888         |                     |
| OTU655                    |                         | genus   | <i>Eremococcus</i>                                    | 0.0000                                      | 1058201142.8571         | 0.0422855890881888         |                     |
| OTU395                    |                         | species | <i>uncultured_bacterium</i>                           | 2116402190.4762                             | 0.0000                  | 0.0422855865049289         |                     |

\* RA: relative abundance

**Supplementary Table S4. Primers and probes used in the study**

| Primer or probe name | Sequence (5'-3')                           | Targets                                 |
|----------------------|--------------------------------------------|-----------------------------------------|
| smu_qPCR_f           | GCCTACAGCTCAGAGATGCTATTCT                  |                                         |
| smu_qPCR_r           | GCCATACACCACTCATGAATTGA                    | <i>S. mutans</i><br><i>gtfB</i>         |
| smu_qPCR_p           | FAM-TGGAAATGACGGTCGCCGTTATGAA-TAMRA        |                                         |
| san_qPCR_f           | CTACCTTAGCACTTATCGTA                       |                                         |
| san_qPCR_r           | CTGTCCTGAACCACTATC                         | <i>S. sanguinis</i><br><i>gtfP</i>      |
| san_qPCR_p           | FAM-CTCTTGAAGTCCACCTGCT-TAMRA              |                                         |
| sg_qPCR_f            | GGTGTGTTTGACCCGTTCCAG                      |                                         |
| sg_qPCR_r            | AGTCCATCCCACGAGCACAG                       | <i>S. gordonii</i><br><i>arcA</i>       |
| sg_qPCR_p            | FAM-AACCTTGACCCGCTCATTACCAGCTAGTATG-TAMRA  |                                         |
| an_qPCR_f            | ACGAAGACGCAAGGACAGAGG                      |                                         |
| an_qPCR_r            | GTAGGCCATGAGATCCGTGACC                     | <i>A. naeslundii</i><br><i>ureA</i>     |
| an_qPCR_p            | FAM-CGCCTACATCACCGCTGAGATCCTCGA-TAMRA      |                                         |
| pg_qPCR_f            | TACCCATCGTCGCCTTGGT                        |                                         |
| pg_qPCR_r            | CGGACTAAAACCGCATACTTG                      | <i>P. gingivalis</i><br><i>16S rRNA</i> |
| pg_qPCR_p            | FAM-GCTAATGGGACGCATGCCTATCTTACAGCT-TAMRA   |                                         |
| universal_qpcr_f     | CGCTAGTAATCGTGGATCAGAATG                   |                                         |
| universal_qpcr_r     | TGTGACGGGCGGTGTGA                          | <i>16S rRNA</i>                         |
| universal_qpcr_p     | FAM-CACGGTGAATACGTTCCCGGGC-TAMRA           |                                         |
| arcA_f               | TTGCTAACAACCGTAAATTCATGC                   | <i>arcA*</i>                            |
| arcA_r               | AAGATCGCCTTCGATTTCTGGGTGA                  |                                         |
| ureC_f               | CACGAGGACTGGGGTGCC                         | <i>ureC**</i>                           |
| ureC_r               | CCCTTCGGTGTGGAAGGTATG                      |                                         |
| ldh_f                | GTTGCTGCTAACCAGTTGACG                      | <i>ldh***</i>                           |
| ldh_r                | TCAGCAAGTGCTTGACGAAA                       |                                         |
| smu_fish             | (Alexa fluor 488)-ACTCCAGACTTTCCTGAC       | <i>S. mutans</i><br><i>16S rRNA</i>     |
| san_fish             | (Alexa fluor 594)-GCATACTATGGTTAAGCCACAGCC | <i>S. sanguinis</i><br><i>16S rRNA</i>  |

\*based on the *arcA* sequences in *S. canis*, *S. cristatus*, *S. gordonii*, *S. rattii*, *S. sanguinis*, *S. suis*

\*\* based on the *ureC* sequences in *S. salivarius*, *A. naeslundii*, *A. viscosus*

\*\*\* based on the *ldh* sequences in *S. gordonii*, *S. mitis*, *S. mutans*, *S. pneumoniae*, *S. pyogenes*, *S. salivarius*, *S. sanguinis*
